# Supplementary material
Source: HighWire-hosted journal article supplement (https://bmjopen.bmj.com/content/11/11/e055106)
Supplement: inline-supplementary-material-1 [file inline-supplementary-material-1.pdf]

## Registration and Data Sheet

|                             |  |                                                                                                                                                                                                                                                        |                       |
|-----------------------------|--|--------------------------------------------------------------------------------------------------------------------------------------------------------------------------------------------------------------------------------------------------------|-----------------------|
| 1. ID                       |  | 2. Village                                                                                                                                                                                                                                             |                       |
| 3. Name                     |  | (Given name)                                                                                                                                                                                                                                           | (Family name) (Other) |
| 4. Name of Household Head   |  |                                                                                                                                                                                                                                                        |                       |
| 5. Date of Birth            |  | (Year)                                                                                                                                                                                                                                                 | (Month) (Day)         |
| 7. Place of Birth           |  | (Province)                                                                                                                                                                                                                                             | (Town/village)        |
| 9. Father's place of Birth  |  | (Province)                                                                                                                                                                                                                                             | (Town/village)        |
| 10. Mother's place of Birth |  | (Province)                                                                                                                                                                                                                                             | (Town/village)        |
| 10. Mother Language         |  |                                                                                                                                                                                                                                                        |                       |
| 11. Gender                  |  | <input type="checkbox"/> Female → (If female) Are you pregnant? <input type="checkbox"/> Yes ( ) months / <input type="checkbox"/> No<br><input type="checkbox"/> Male Are you giving susu? <input type="checkbox"/> Yes / <input type="checkbox"/> No |                       |

|                                                                                                                                                                                                                                                     |  |                                                                                    |                             |
|-----------------------------------------------------------------------------------------------------------------------------------------------------------------------------------------------------------------------------------------------------|--|------------------------------------------------------------------------------------|-----------------------------|
| If other member(s) from your household already replied the following items 12-18, please write the ID of that member(s) and skip to item 19.                                                                                                        |  | ID of your household member, who already answered the following questions: if any. |                             |
| Do you/your household members make a garden (are you a farmer)?                                                                                                                                                                                     |  | <input type="checkbox"/> Yes                                                       | <input type="checkbox"/> No |
| 12. Do you have enough food to eat from your garden?                                                                                                                                                                                                |  | <input type="checkbox"/> Yes                                                       | <input type="checkbox"/> No |
| 13. Do you/your household members do fishing (including any methods)?                                                                                                                                                                               |  | <input type="checkbox"/> Yes                                                       | <input type="checkbox"/> No |
| Do you have enough food to eat from fishing?                                                                                                                                                                                                        |  | <input type="checkbox"/> Yes                                                       | <input type="checkbox"/> No |
| 14. Are you/your household members employed by company/government/others?                                                                                                                                                                           |  | <input type="checkbox"/> Yes                                                       | <input type="checkbox"/> No |
| 15. Do you/your household members run a business (e.g., store manager)?                                                                                                                                                                             |  | <input type="checkbox"/> Yes                                                       | <input type="checkbox"/> No |
| 16. Do you have enough money to meet your needs?                                                                                                                                                                                                    |  | <input type="checkbox"/> Yes                                                       | <input type="checkbox"/> No |
| 17. What is your housing type? Choose ONE from the following list:                                                                                                                                                                                  |  | (Answer)                                                                           |                             |
| (A) Traditional leaf house, (B) Western style house, (C) Traditional-Western-mix house<br>(D) Temporary house (e.g., tent), (E) Others (specify )                                                                                                   |  |                                                                                    |                             |
| 18. Please check <input checked="" type="checkbox"/> all items that you or your household members own:                                                                                                                                              |  |                                                                                    |                             |
| <input type="checkbox"/> Outboard motors/car/truck, <input type="checkbox"/> Chainsaw, <input type="checkbox"/> Mobile phone, <input type="checkbox"/> Radio/Stereo, <input type="checkbox"/> Video/DVD,<br><input type="checkbox"/> Rainwater tank |  |                                                                                    |                             |

|                                                                            |  |                                                                         |                          |  |                                                                   |
|----------------------------------------------------------------------------|--|-------------------------------------------------------------------------|--------------------------|--|-------------------------------------------------------------------|
| 19. Body temperature                                                       |  | °C                                                                      | 20. Do you feel ill now? |  | <input type="checkbox"/> Yes (how ) / <input type="checkbox"/> No |
| 21. Did you take any medicine (including local herbal) over the last week? |  | <input type="checkbox"/> Yes →                                          | What? ( )                |  |                                                                   |
|                                                                            |  | <input type="checkbox"/> No                                             | When? ( )                |  |                                                                   |
| 22. Have you ever diagnosed as diabetes by a doctor?                       |  | <input type="checkbox"/> Yes (when ) / <input type="checkbox"/> No      |                          |  |                                                                   |
| Do you take a drug/local herbal medicine for diabetes?                     |  | <input type="checkbox"/> Yes (what when ) / <input type="checkbox"/> No |                          |  |                                                                   |
| 23. Have you ever diagnosed as hypertension by a doctor?                   |  | <input type="checkbox"/> Yes (when ) / <input type="checkbox"/> No      |                          |  |                                                                   |
| Do you take a drug/local herbal medicine for hypertension?                 |  | <input type="checkbox"/> Yes (what when ) / <input type="checkbox"/> No |                          |  |                                                                   |

|                |      |        |      |        |      |        |
|----------------|------|--------|------|--------|------|--------|
| Blood Pressure | SBP1 | (mmHg) | SBP2 | (mmHg) | SBP3 | (mmHg) |
|                | DBP1 | (mmHg) | DBP2 | (mmHg) | DBP3 | (mmHg) |

|                  |      |                      |      |                   |      |
|------------------|------|----------------------|------|-------------------|------|
| Height           | (cm) | Weight               | (kg) | Arm Circumference | (cm) |
| Triceps skinfold | (mm) | Subscapular skinfold | (mm) |                   |      |

|             |                                                                                        |       |     |     |         |
|-------------|----------------------------------------------------------------------------------------|-------|-----|-----|---------|
| Malaria ICT | <input type="checkbox"/> Pf+ <input type="checkbox"/> Pv+ <input type="checkbox"/> Nil | HbA1C | (%) | CRP | (mg/dL) |
|-------------|----------------------------------------------------------------------------------------|-------|-----|-----|---------|

Do you want to know the results of Health Check-Ups? ☐ Yes / ☐ No
